# Supplementary material
Source: PubMed Central journal article supplement (PMC4056912)
Supplement: ml300018e_si_001.pdf [file ml300018e_si_001.pdf]

## **3-Arylcoumarin derivatives manifest anti-proliferative activity through Hsp90 inhibition**

*Huiping Zhao, Bin Yan, Laura B. Peterson and Brian S. J. Blagg\**

Department of Medicinal Chemistry, 1251 Wescoe Hall Drive, Malott 4070,

The University of Kansas, Lawrence, Kansas 66045-7563

\* Author to whom correspondence should be addressed.

Phone: (785) 864-2288. Fax: (785) 864-5326. Email: bblagg@ku.edu.

† The University of Kansas

## **Supplementary Information**

### 3-(benzo[d][1,3]dioxol-5-yl)-7-hydroxy-8-methyl-2H-chromen-2-one (6)

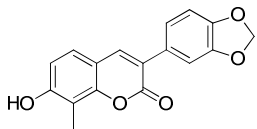

A solution of formyl-resorcinol **3** (500 mg, 3.29 mmol) and 3,4-methylenedioxyphenylacetic acid (590 mg, 3.29 mmol) in acetic anhydride (2 mL) was treated with pyridine (2 mL) under reflux for 12 hours. The excess acetic anhydride was evaporated under vacuum and the resulting brown oil was dissolved in a mixture of triethylamine and methanol (v/v: 1:10, 10 mL). After stirring for 8 hours, the solution was concentrated. The residue was dissolved in water, neutralized with hydrochloride and extracted with ethyl acetate (2x50 mL). The combined organic layer was dried over magnesium sulfate and the solvent was removed. The residue was purified via column chromatography (SiO<sub>2</sub>, dichloromethane:acetone 40:1) to afford **6** as a yellow amorphous solid (520 mg, 2 steps, 53%). <sup>1</sup>HNMR (500 MHz, CDCl<sub>3</sub>) δ 7.98 (s, 1H), 7.42 (d, *J* = 8.0 Hz, 1H), 7.30 (s, 1H), 7.27 (d, *J* = 8.0, 1H), 6.90 (m, 2H), 6.05 (s, 2H), 2.29 (s, 3H). <sup>13</sup>C NMR (100 MHz, CDCl<sub>3</sub>) δ 161.05, 159.15, 152.94 147.41 (2C), 141.14, 129.23, 126.98, 122.52, 121.62, 112.71, 112.39, 110.80, 108.99, 108.52, 101.57, 8.2. HRMS (ESI) *m/z* [M+H]<sup>+</sup> calcd for C<sub>17</sub>H<sub>11</sub>O<sub>5</sub> 295.0606, found 295.0602.

### 3-(benzo[d][1,3]dioxol-5-yl)-8-methyl-7-((1-methylpiperidin-4-yl)oxy)-2H-chromen-2-one: general procedure for the synthesis of **1** and **20a–e**.

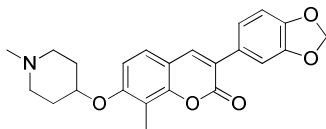

Diisopropylazodicarboxylate (60.6 mg, 0.30 mmol) was added to a solution of *N*-methyl-4-hydroxypiperidine **7** (17.1 mg, 0.15 mmol), phenol **6** (44.0 mg, 0.15 mmol) and triphenylphosphine (78.7 mg, 0.30 mmol) in anhydrous THF (3 mL). After 2 h, the solvent was removed and the residue was purified via column chromatography (SiO<sub>2</sub>, 10:1, CH<sub>2</sub>Cl<sub>2</sub>:methanol) to afford compound **1** as a yellow amorphous solid (51 mg, 88%). <sup>1</sup>HNMR (400 MHz, CDCl<sub>3</sub>) δ 7.66 (s, 1H), 7.29 (d, *J* = 8.0 Hz, 1H), 7.21 (s, 1H),

7.15 (d,  $J = 8.0$  Hz, 1H), 6.85 (d,  $J = 8.0$  Hz, 1H), 6.82 (d,  $J = 8.0$  Hz, 1H), 5.99 (s, 2H), 4.51 (m, 1H), 2.70 (m, 2H), 2.67 (m, 2H), 2.47 (s, 3H), 2.37 (s, 3H), 2.06 (m, 2H), 1.94 (m, 2H).  $^{13}\text{C}$  NMR (100 MHz,  $\text{CDCl}_3$ )  $\delta$  161.3, 158.1, 153.0, 148.0, 147.8, 139.8, 129.3, 125.8, 124.3, 122.4, 115.1, 113.7, 109.8, 109.2, 108.4, 101.4, 71.9, 52.2, 46.2, 30.6, 8.6. HRMS (ESI<sup>+</sup>)  $m/z$  [ $\text{M}+\text{H}^+$ ] calcd for  $\text{C}_{22}\text{H}_{24}\text{NO}_5$  382.1654, found 382.1655.

### 7-methoxy-2H-chromen-2-one (9)

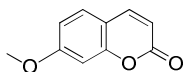

Sodium hydride (553 mg, 15 mmol) was added to a solution of umbelliferone (**8**, 1.62 g, 10 mmol) in DMF, followed by iodomethane (2.84 g, 20 mmol). The solution was stirred at room temperature for 4 hour and quenched by ice/water. The solid was filtered and dried under vacuum to give compound **9** as colorless amorphous solid (1.65 g, 94%).  $^1\text{H}$ NMR (500 MHz,  $\text{CDCl}_3$ )  $\delta$  7.75 (d,  $J = 8.0$  Hz, 1H), 7.68 (d,  $J = 8.0$  Hz, 1H), 7.05 (s, 1H), 7.01 (d,  $J = 8.0$  Hz, 1H), 6.12 (d,  $J = 8.0$  Hz, 1H) 3.81 (s, 3H).  $^{13}\text{C}$  NMR (126 MHz,  $\text{CDCl}_3$ )  $\delta$  159.21, 158.13, 153.90, 142.10, 129.77, 114.40, 113.03, 100.92, 101.53, 56.76. HRMS (ESI<sup>+</sup>)  $m/z$  [ $\text{M}+\text{H}^+$ ] calcd for  $\text{C}_{10}\text{H}_9\text{O}_3$  177.0552, found 177.0554.

### 3-bromo-7-methoxy-2H-chromen-2-one (10)

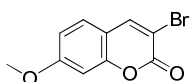

*N*-bromosuccinimide (1.78 g, 10 mmol) was added to a solution of compound **9** (880 mg, 5 mmol) and sodium acetate (41 mg, 0.5 mmol) in acetonitrile (100 mL). The resulting solution was stirred at room temperature until the starting material disappeared, and then quenched with water and extracted with ethyl acetate. The combined organic layers was washed with water and saturated sodium chloride solution, dried over anhydrous magnesium sulfate and concentrated to dryness. The residue was purified via column chromatography ( $\text{SiO}_2$ , 100:1,  $\text{CH}_2\text{Cl}_2$ :acetone) to give compound **10** as a brown amorphous solid (1.16 g, 91%).  $^1\text{H}$ NMR (400 MHz,  $\text{CDCl}_3$ )  $\delta$  8.05 (s, 1H), 7.35 (d,  $J = 8.0$  Hz, 1H), 6.85 (d,  $J = 8.0$  Hz, 1H), 6.80 (s, 1H), 3.84 (s, 3H).  $^{13}\text{C}$  NMR (126 MHz,  $\text{CDCl}_3$ )  $\delta$  160.12, 158.17, 154.90, 145.13, 128.32, 113.40, 113.38, 113.07, 100.63, 55.82. HRMS (ESI<sup>+</sup>)  $m/z$  [ $\text{M}+\text{H}^+$ ] calcd for  $\text{C}_{10}\text{H}_8\text{BrO}_3$  254.9657, found 254.9659.

### 3-bromo-7-hydroxy-2H-chromen-2-one (11)

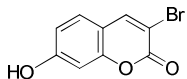

Tribromoborane (2.36 g, 9.46 mmol) was added to a solution of compound **10** (1.2 g, 4.73 mmol) in dichloromethane (50 mL) at 0 °C. The resulting mixture was refluxed for 12 hours and poured to an ice/water mixture after it was cooled to room temperature. The solid was filtered and vacuum-dried to give compound **11** as a grey amorphous solid (930 mg, 82%). <sup>1</sup>H NMR (400 MHz, CDCl<sub>3</sub>) δ 8.05 (s, 1H), 7.35 (d, *J* = 8.0 Hz, 1H), 6.86 (d, *J* = 8.0 Hz, 1H), 6.81 (s, 1H). <sup>13</sup>C NMR (126 MHz, CDCl<sub>3</sub>) δ 161.68, 156.94, 154.77, 145.53, 129.30, 113.72, 111.94, 105.30, 102.10. HRMS (ESI) *m/z* [M+H]<sup>+</sup> calcd for C<sub>9</sub>H<sub>4</sub>BrO<sub>3</sub> 238.9344, found 238.9345.

### 3-bromo-7-((1-methylpiperidin-4-yl)oxy)-2H-chromen-2-one (12)

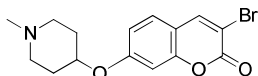

Diisopropylazodicarboxylate (885 mg, 3.74 mmol) was added to a solution of *N*-methyl-4-hydroxypiperidine (215 mg, 1.87 mmol) and phenol **11** (450 mg, 1.87 mmol), and triphenylphosphine (981 mg, 3.74 mmol) in anhydrous THF (20 mL). After 2 h, the solvent was removed and the residue purified via column chromatography (SiO<sub>2</sub>, 10:1, CH<sub>2</sub>Cl<sub>2</sub>:methanol) to afford compound **12** as a brown amorphous solid (510 mg, 81%). <sup>1</sup>H NMR (500 MHz, CDCl<sub>3</sub>) δ 8.01 (s, 1H), 7.34 (d, *J* = 8.0 Hz, 1H), 6.86 (d, *J* = 8.0 Hz, 1H), 6.82 (s, 1H), 4.40 (m, 1H), 2.72 (m, 2H), 2.34 (m, 2H), 2.32 (s, 3H), 2.05 (m, 2H), 1.89 (m, 2H). <sup>13</sup>C NMR (126 MHz, CDCl<sub>3</sub>) δ 161.17, 157.75, 155.26, 144.65, 128.39, 114.60, 113.13, 107.82, 102.38, 73.08, 52.62, 46.30, 30.66. HRMS (ESI<sup>+</sup>) *m/z* [M+H]<sup>+</sup> calcd for C<sub>15</sub>H<sub>17</sub>BrNO<sub>3</sub> 338.0392, found 338.0388.

### 7-((1-methylpiperidin-4-yl)oxy)-3-phenyl-2H-chromen-2-one (14a): General procedure for Suzuki coupling reaction.

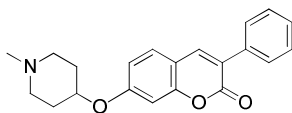

1,1'-Bis(diphenylphosphino)ferrocene-palladium(II)dichloride dichloromethane (8.2 mg, 0.01 mmol) was added to a solution of compound **12** (34 mg, 0.1 mmol), phenylbromic acid (37 mg, 0.3 mmol) and potassium carbonate (1M, 0.05 mL) in 1,4-dioxane (5 mL). The mixture was stirred at 80 °C for 12 hours, quenched with water and extracted with ethyl acetate. The combined organic layer was washed with water and saturated sodium chloride solution, dried over anhydrous magnesium sulfate and concentrated to dryness. The residue was purified via column chromatography (SiO<sub>2</sub>, 100:1, CH<sub>2</sub>Cl<sub>2</sub>: methanol) to give compound **14a** as a brown amorphous solid (26 mg, 78%). <sup>1</sup>HNMR (500 MHz, CDCl<sub>3</sub>) δ 7.76 (s, 1H), 7.48 (d, *J* = 8.1 Hz, 2H), 7.44~7.39 (m, 5H), 6.88~7.85 (m, 2H), 4.41~4.39 (m, 1H), 2.74 (m, 2H), 2.35 (m, 2H), 2.34 (s, 3H), 2.07 (m, 2H), 1.91 (m, 2H). <sup>13</sup>C NMR (126 MHz, CDCl<sub>3</sub>) δ 161.11, 160.69, 155.46, 140.21, 135.19, 129.14, 128.63, 128.61, 128.58, 124.92, 114.24, 113.47, 102.14, 72.95, 52.56, 46.15, 30.58. HRMS (ESI+) *m/z* [M+H<sup>+</sup>] calcd for C<sub>21</sub>H<sub>22</sub>NO<sub>3</sub> 336.1600, found 336.1604.

### 3-(2-chlorophenyl)-7-((1-methylpiperidin-4-yl)oxy)-2H-chromen-2-one (14b)

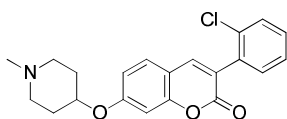

Compound **14b** was obtained as a white amorphous solid (28 mg, 76%). <sup>1</sup>HNMR (400 MHz, CDCl<sub>3</sub>) δ 7.68 (s, 1H), 7.48 (d, *J* = 8.0 Hz, 1H), 7.43~7.39 (m, 2H), 7.35~7.32 (m, 2H), 6.89~6.86 (m, 2H), 4.42 (m, 1H), 2.73 (m, 2H), 2.35 (m, 2H), 2.34 (s, 3H), 2.05 (m, 2H), 1.91 (m, 2H). <sup>13</sup>C NMR (101 MHz, CDCl<sub>3</sub>) δ 161.11, 160.36, 156.02, 143.01, 134.26, 133.97, 131.75, 130.15, 129.97, 129.37, 127.07, 123.57, 114.25, 112.77, 102.44, 72.85, 52.56, 46.36, 30.69. HRMS (ESI+) *m/z* [M+H<sup>+</sup>] calcd for C<sub>21</sub>H<sub>21</sub>ClNO<sub>3</sub> 370.1210, found 370.1212.

### 3-(3-chlorophenyl)-7-((1-methylpiperidin-4-yl)oxy)-2H-chromen-2-one (14c)

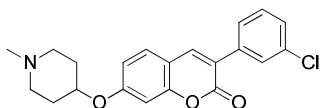

Compound **14c** was obtained as a colorless amorphous solid (34 mg, 75%). <sup>1</sup>HNMR (500 MHz, CDCl<sub>3</sub>) δ 7.77 (s, 1H), 7.68 (s, 1H), 7.60~7.58 (m, 1H), 7.44 (d, *J* = 8.2 Hz,

1H), 7.38~7.34 (m, 2H), 6.88~6.85 (m, 2H), 4.43 (m, 1H), 2.76 (m, 2H), 2.40 (m, 2H), 2.36 (s, 3H), 2.09 (m, 2H), 1.90 (m, 2H). <sup>13</sup>C NMR (126 MHz, CDCl<sub>3</sub>) δ 161.01, 160.69, 155.61, 140.75, 136.89, 134.50, 129.84, 129.36, 128.67, 128.58, 126.78, 123.48, 114.36, 113.22, 102.17, 72.80, 52.49, 46.14, 30.48. HRMS (ESI<sup>+</sup>) m/z [M+H<sup>+</sup>] calcd for C<sub>21</sub>H<sub>21</sub>ClNO<sub>3</sub> 370.1210, found 370.1209.

### 3-(4-chlorophenyl)-7-((1-methylpiperidin-4-yl)oxy)-2H-chromen-2-one (14d)

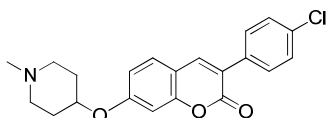

Compound **14d** was obtained as a brown amorphous solid (14 mg, 64%). <sup>1</sup>H NMR (500 MHz, CDCl<sub>3</sub>) δ 7.77 (s, 1H), 7.65 (d, *J* = 8.5 Hz, 2H), 7.46~7.41 (m, 3H), 6.89~6.86 (m, 2H), 4.44 (m, 1H), 2.77 (m, 2H), 2.42 (m, 2H), 2.38 (s, 3H), 2.11 (m, 2H), 1.94 (m, 2H). <sup>13</sup>C NMR (126 MHz, CDCl<sub>3</sub>) δ 160.88 (2C), 155.55, 140.26, 134.62, 133.60, 129.89, 129.26, 128.84, 123.74, 114.41, 113.34, 102.20, 72.80, 52.53, 46.17, 30.51. HRMS (ESI<sup>+</sup>) m/z [M+H<sup>+</sup>] calcd for C<sub>21</sub>H<sub>21</sub>ClNO<sub>3</sub> 370.1210, found 370.1214.

### 7-((1-methylpiperidin-4-yl)oxy)-3-(*p*-tolyl)-2H-chromen-2-one (14e)

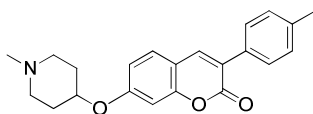

Compound **14e** was obtained as a white amorphous solid (13 mg, 63%). <sup>1</sup>H NMR (400 MHz, CDCl<sub>3</sub>) δ 7.72 (s, 1H), 7.58 (d, *J* = 8.0 Hz, 2H), 7.41 (d, *J* = 8.0 Hz, 1H), 7.24 (d, *J* = 8.0 Hz, 2H), 6.85 (m, 2H), 4.41 (m, 1H), 2.74 (m, 2H), 2.50 (m, 2H), 2.38 (s, 3H), 3.37 (m, 2H), 2.35 (s, 3H), 1.92 (m, 2H), 1.89 (m, 2H). <sup>13</sup>C NMR (126 MHz, CDCl<sub>3</sub>) δ 161.21, 160.40, 155.28, 139.59, 138.61, 132.21, 129.29, 129.03, 128.40, 124.87, 114.09, 113.54, 102.09, 72.55, 52.49, 46.15, 30.45, 21.46. HRMS (ESI<sup>+</sup>) m/z [M+H<sup>+</sup>] calcd for C<sub>22</sub>H<sub>24</sub>NO<sub>3</sub> 350.1756, found 350.1751.

### 3-(4-methoxyphenyl)-7-((1-methylpiperidin-4-yl)oxy)-2H-chromen-2-one (14f)

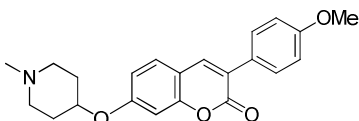

Compound **14f** was obtained as a brown amorphorous solid (28 mg, 65%). <sup>1</sup>H NMR (500 MHz, CDCl<sub>3</sub>+CH<sub>3</sub>OH) δ 7.69 (s, 1H), 7.64 (d, *J* = 8.0 Hz, 2H), 7.41 (d, *J* = 8.0 Hz, 1H), 6.95 (d, *J* = 8.0 Hz, 2H), 6.84 (m, 2H), 4.42 (m, 1H), 3.84 (s, 3H), 2.76 (m, 2H), 2.41 (m, 2H), 2.37 (s, 3H), 2.09 (m, 2H), 1.92 (m, 2H). <sup>13</sup>C NMR (126 MHz, CDCl<sub>3</sub>+CH<sub>3</sub>OH) δ 161.30, 160.30, 160.03, 155.22, 138.90, 129.85, 128.95, 127.57, 124.64, 114.10, 114.07, 113.71, 102.22, 72.44, 55.58, 52.50, 46.13, 30.47. HRMS (ESI<sup>+</sup>) *m/z* [M+H<sup>+</sup>] calcd for C<sub>22</sub>H<sub>24</sub>NO<sub>4</sub> 366.1705, found 366.1709.

**7-((1-methylpiperidin-4-yl)oxy)-3-(3-(trifluoromethyl)phenyl)-2H-chromen-2-one (14g)**

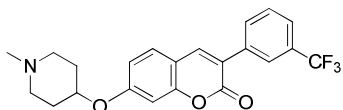

Compound **14h** was obtained as a yellow amorphorous solid (11 mg, 46%). <sup>1</sup>H NMR (500 MHz, CDCl<sub>3</sub>) δ 7.91 (s, 1H), 7.89 (d, *J* = 8.1 Hz, 1H), 7.80 (s, 1H), 7.62 (d, *J* = 8.8 Hz, 1H), 7.54 (t, *J* = 8.0 Hz, 1H), 7.45 (d, *J* = 8.5 Hz, 1H), 6.88~6.84 (m, 2H), 4.43 (m, 1H), 2.75 (m, 2H), 2.42 (m, 2H), 2.36 (s, 3H), 2.09 (m, 2H), 1.91 (m, 2H). <sup>13</sup>C NMR (126 MHz, CDCl<sub>3</sub>) δ 161.08, 160.72, 155.69, 141.01, 135.93, 131.99, 131.19, 130.93, 129.45, 129.08, 125.29, 123.43, 114.40, 113.19, 102.20, 81.04, 72.58, 52.38, 46.05, 30.34. HRMS (ESI<sup>+</sup>) *m/z* [M+H<sup>+</sup>] calcd for C<sub>22</sub>H<sub>21</sub>F<sub>3</sub>NO<sub>3</sub> 404.1474, found 404.1478.

**7-((1-methylpiperidin-4-yl)oxy)-3-(4-(trifluoromethoxy)phenyl)-2H-chromen-2-one (14h)**

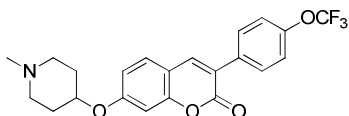

Compound **14h** was obtained as a yellow amorphorous solid (28 mg, 67%). <sup>1</sup>H NMR (500 MHz, CDCl<sub>3</sub>) δ 7.76 (s, 1H), 7.73 (d, *J* = 8.0 Hz, 2H), 7.42 (d, *J* = 8.0 Hz, 1H), 7.28 (m, 2H), 6.87 (m, 2H), 4.40 (m, 1H), 2.72 (m, 2H), 2.34 (m, 2H), 2.32 (s, 3H), 2.05 (m, 2H), 1.89 (m, 2H). <sup>13</sup>C NMR (126 MHz, CDCl<sub>3</sub>) δ 161.06, 160.94, 155.59, 149.37, 149.35, 140.59, 133.83, 130.09, 129.27, 123.45, 121.03, 114.45, 113.20, 102.14, 73.12, 52.67,

46.30, 30.73. HRMS (ESI<sup>+</sup>) m/z [M+H<sup>+</sup>] calcd for C<sub>22</sub>H<sub>21</sub>F<sub>3</sub>NO<sub>4</sub> 420.1423 found 420.1419.

**3-(7-((1-methylpiperidin-4-yl)oxy)-2-oxo-2H-chromen-3-yl)benzonitrile (14i)**

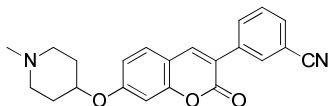

Compound **14i** was obtained as a brown amorphous solid (21 mg, 58%). <sup>1</sup>HNMR (500 MHz, CDCl<sub>3</sub>) δ 7.97 (s, 1H), 7.98 (d, *J* = 7.9 Hz, 1H), 7.83 (s, 1H), 7.68 (d, *J* = 8.7 Hz, 1H), 7.56 (t, *J* = 7.9 Hz, 1H), 7.48 (d, *J* = 8.6 Hz, 1H), 6.90 (d, *J* = 8.5 Hz, 1H), 6.88 (s, 1H), 4.46 (m, 1H), 2.77 (m, 2H), 2.42 (m, 2H), 2.38 (s, 3H), 2.10 (m, 2H), 1.94 (m, 2H). <sup>13</sup>C NMR (126 MHz, CDCl<sub>3</sub>) δ 161.39, 160.58, 155.81, 141.29, 136.44, 132.94, 132.09, 131.96, 129.56, 129.48, 122.51, 118.75, 114.59, 113.03, 112.94, 102.21, 72.76, 52.47, 46.16, 30.47. HRMS (ESI<sup>+</sup>) m/z [M+H<sup>+</sup>] calcd for C<sub>22</sub>H<sub>21</sub>N<sub>2</sub>O<sub>3</sub> 361.1552, found 361.1555.

**3-(4-fluorophenyl)-7-((1-methylpiperidin-4-yl)oxy)-2H-chromen-2-one (14j)**

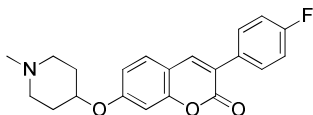

Compound **14j** was obtained as a brown amorphous solid (23 mg, 51%). <sup>1</sup>HNMR (400 MHz, CDCl<sub>3</sub>) δ 7.72 (s, 1H), 7.68~7.64 (m, 2H), 7.42 (d, *J* = 8.0 Hz, 1H), 7.13~7.09 (m, 2H), 6.88~6.85 (m, 2H), 4.43 (m, 1H), 2.75 (m, 2H), 2.40 (m, 2H), 2.36 (s, 3H), 2.09 (m, 2H), 1.90 (m, 2H). <sup>13</sup>C NMR (126 MHz, CDCl<sub>3</sub>) δ 162.01, 161.07, 160.73, 155.46, 140.03, 130.45, 130.37, 129.16, 123.94, 115.71, 115.61, 113.39, 102.19, 72.95, 52.51, 46.14, 30.50. HRMS (ESI<sup>+</sup>) m/z [M+H<sup>+</sup>] calcd for C<sub>21</sub>H<sub>21</sub>FNO<sub>3</sub> 354.1505, found 354.1507.

**3-(3-fluorophenyl)-7-((1-methylpiperidin-4-yl)oxy)-2H-chromen-2-one (14k)**

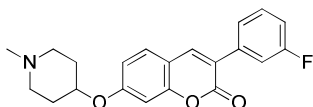



Compound **14k** was obtained as a colorless amorphous solid (25 mg, 72%). <sup>1</sup>H NMR (400 MHz, CDCl<sub>3</sub>) δ 7.78 (s, 1H), 7.48~7.36 (m, 4H), 7.08 (t, *J* = 8.6 Hz, 1H), 6.87~6.85 (m, 2H), 4.40 (m, 1H), 2.72 (m, 2H), 2.34 (m, 2H), 2.33 (s, 3H), 2.05 (m, 2H), 1.90 (m, 2H). <sup>13</sup>C NMR (101 MHz, CDCl<sub>3</sub>) δ 164.07, 161.63, 161.10, 160.75, 155.61, 140.63, 137.20, 130.15, 129.34, 124.13, 123.50, 115.61, 114.39, 113.14, 102.10, 73.17, 52.76, 46.38, 30.64. HRMS (ESI+) *m/z* [M+H<sup>+</sup>] calcd for C<sub>21</sub>H<sub>21</sub>FNO<sub>3</sub> 354.1505, found 354.1502.

### 3-(benzo[d][1,3]dioxol-5-yl)-7-((1-methylpiperidin-4-yl)oxy)-2H-chromen-2-one (14l)

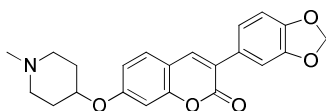

Compound **14l** was obtained as a brown amorphous solid (14.7 mg, 39%). 7.69 (s, 1H), 7.41 (d, *J* = 8.3 Hz, 1H), 7.22 (s, 1H), 7.16 (d, *J* = 8.1 Hz, 1H), 6.87 (d, *J* = 8.1 Hz, 2H), 6.84 (s, 1H), 6.00 (s, 2H), 4.39 (m, 1H), 2.72 (m, 2H), 2.34 (m, 2H), 2.33 (s, 3H), 2.05 (m, 2H), 1.89 (m, 2H). <sup>13</sup>C NMR (101 MHz, CDCl<sub>3</sub>) δ 161.15, 160.58, 155.24, 148.04, 147.83, 139.36, 129.12, 128.97, 124.49, 122.46, 114.23, 113.44, 109.18, 108.47, 102.11, 101.46, 72.83, 52.74, 46.33, 30.81. HRMS (ESI+) *m/z* [M+H<sup>+</sup>] calcd for C<sub>22</sub>H<sub>22</sub>NO<sub>5</sub> 380.1498, found 380.1501.

### 7-((1-methylpiperidin-4-yl)oxy)-3-(4-phenoxyphenyl)-2H-chromen-2-one (14m)

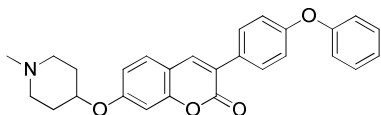

Compound **14m** was obtained as a white amorphous solid (29 mg, 68%). <sup>1</sup>H NMR δ 7.73 (s, 1H), 7.67 (d, *J* = 8.7 Hz, 2H), 7.42 (d, *J* = 8.7 Hz, 1H), 7.36 (t, *J* = 8.2 Hz, 2H), 7.14 (t, *J* = 7.4 Hz, 1H), 7.07~7.04 (m, 4H), 6.88~6.85 (m, 2H), 4.40 (m, 1H), 2.72 (m, 2H), 2.34 (m, 2H), 2.33 (s, 3H), 2.05 (m, 2H), 1.89 (m, 2H). <sup>13</sup>C NMR (101 MHz, CDCl<sub>3</sub>) δ 161.18, 160.64, 157.83, 156.89, 155.33, 139.56, 130.05, 130.00, 129.97, 129.02, 124.21, 123.81, 119.44, 118.60, 114.26, 113.46, 102.13, 73.04, 52.68, 46.31, 30.77. HRMS (ESI+) *m/z* [M+H<sup>+</sup>] calcd for C<sub>27</sub>H<sub>26</sub>NO<sub>4</sub> 428.1862, found 428.1856.

### 3-(4-(tert-butyl)phenyl)-7-((1-methylpiperidin-4-yl)oxy)-2H-chromen-2-one (14n)

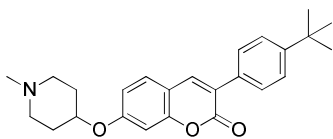

Compound **14n** was obtained as a brown amorphous solid (15 mg, 62%).  $^1\text{H}$  NMR  $\delta$  7.74 (s, 1H), 7.63 (d,  $J = 8.0$  Hz, 2H), 7.44 (d,  $J = 8.0$  Hz, 2H), 7.42 (d,  $J = 8.0$  Hz, 1H), 6.86 (m, 2H), 4.43 (m, 1H), 2.76 (m, 2H), 2.41 (m, 2H), 2.37 (s, 3H), 2.10 (m, 2H), 1.92 (m, 2H), 1.35 (s, 9H).  $^{13}\text{C}$  NMR (126 MHz,  $\text{CDCl}_3$ )  $\delta$  161.20, 160.52, 155.42, 151.84, 139.59, 132.30, 129.07, 128.28, 125.63, 125.03, 114.14, 113.71, 102.33, 72.14, 52.54, 46.15, 34.88, 31.49, 30.52. HRMS (ESI $^+$ )  $m/z$   $[\text{M}+\text{H}^+]$  calcd for  $\text{C}_{25}\text{H}_{30}\text{NO}_3$  392.2226, found 392.2230.

### 3-([1,1'-biphenyl]-2-yl)-7-((1-methylpiperidin-4-yl)oxy)-2H-chromen-2-one (14o)

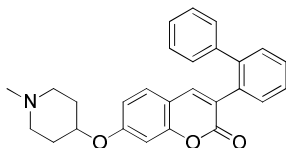

Compound **14o** was obtained as a brown amorphous solid (18 mg, 64%).  $^1\text{H}$  NMR (500 MHz,  $\text{CDCl}_3$ )  $\delta$  7.50~7.43 (m, 4H), 7.39 (s, 1H), 7.32~7.27 (m, 4H), 7.25~7.23 (m, 2H), 6.81~6.79 (m, 2H), 4.44 (m, 1H), 2.81 (m, 2H), 2.51 (m, 2H), 2.43 (s, 3H), 2.16 (m, 2H), 1.95 (m, 2H).  $^{13}\text{C}$  NMR (126 MHz,  $\text{CDCl}_3$ )  $\delta$  160.83, 160.30, 155.51, 142.58, 141.96, 141.39, 133.83, 130.74, 130.61, 129.28, 129.00, 128.92, 128.41, 127.54, 127.10, 126.01, 113.79, 113.20, 102.33, 72.05, 52.26, 45.90, 30.10. HRMS (ESI $^+$ )  $m/z$   $[\text{M}+\text{H}^+]$  calcd for  $\text{C}_{27}\text{H}_{26}\text{NO}_3$  412.1913, found 412.1910.

### 3-([1,1'-biphenyl]-4-yl)-7-((1-methylpiperidin-4-yl)oxy)-2H-chromen-2-one (14p)

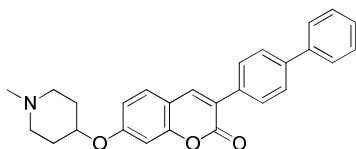

Compound **14p** was obtained as a brown amorphous solid (28 mg, 68%).  $^1\text{H}$  NMR (500 MHz,  $\text{CDCl}_3$ )  $\delta$  7.69 (s, 1H), 7.66 (m, 2H), 7.50 (m, 2H), 7.47 (m, 2H), 7.39 (m, 3H), 6.90 (m, 2H), 4.44 (m, 1H), 2.78 (m, 2H), 2.42 (m, 2H), 2.39 (s, 3H), 1.97 (m, 2H), 1.92 (m,

2H).  $^{13}\text{C}$  NMR (126 MHz,  $\text{CDCl}_3$ )  $\delta$  161.13, 160.70, 155.49, 141.48, 140.73, 139.96, 134.13, 129.19, 129.05, 128.98, 127.74, 127.36, 127.30, 124.54, 114.26, 113.56, 102.22, 72.75, 52.54, 46.16, 30.54. HRMS ( $\text{ESI}^+$ )  $m/z$   $[\text{M}+\text{H}^+]$  calcd for  $\text{C}_{27}\text{H}_{26}\text{NO}_3$  412.1913, found 412.1914.

### 3-(benzo[b]thiophen-2-yl)-7-((1-methylpiperidin-4-yl)oxy)-2H-chromen-2-one (16a)

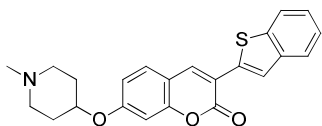

Compound **16a** was obtained as a yellow amorphous solid (12 mg, 52%).  $^1\text{H}$  NMR (500 MHz,  $\text{CDCl}_3$ )  $\delta$  8.19 (s, 1H), 8.02 (s, 1H), 7.84 (t,  $J = 12$  Hz, 2H), 7.49 (d,  $J = 8.0$  Hz, 1H), 7.38 (m, 2H), 6.90 (m, 2H), 4.43 (m, 1H), 2.75 (m, 2H), 2.36 (m, 2H), 2.35 (s, 3H), 2.09 (m, 2H), 1.92 (m, 2H).  $^{13}\text{C}$  NMR (126 MHz,  $\text{CDCl}_3$ )  $\delta$  161.11, 159.52, 155.03, 140.57, 139.42, 138.26, 136.94, 129.32, 125.32, 124.86, 124.65, 124.41, 122.14, 118.49, 114.67, 113.04, 102.10, 72.94, 52.71, 46.21, 30.70. HRMS ( $\text{ESI}^+$ )  $m/z$   $[\text{M}+\text{H}^+]$  calcd for  $\text{C}_{23}\text{H}_{22}\text{NO}_3\text{S}$  392.1320, found 392.1323.

### 3-(benzofuran-2-yl)-7-((1-methylpiperidin-4-yl)oxy)-2H-chromen-2-one (16b)

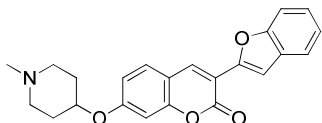

Compound **16b** was obtained as a colorless amorphous solid (16 mg, 46%).  $^1\text{H}$  NMR (500 MHz,  $\text{CDCl}_3$ )  $\delta$  8.34 (s, 1H), 7.70 (s, 1H), 7.65 (m, 1H), 7.50 (m, 2H), 7.35 (m, 1H), 7.26 (m, 1H), 6.89 (d,  $J = 8.0$  Hz, 1H), 6.86 (s, 1H), 4.47 (m, 1H), 2.82 (m, 2H), 2.56 (m, 2H), 2.43 (s, 3H), 2.13 (m, 2H), 1.96 (m, 2H).  $^{13}\text{C}$  NMR (126 MHz,  $\text{CDCl}_3$ )  $\delta$  160.81, 158.64, 155.04, 154.73, 149.75, 136.69, 129.70, 129.52, 125.45, 123.39, 122.07, 114.94, 114.44, 113.19, 110.95, 108.30, 102.34, 71.72, 51.89, 45.70, 29.88. HRMS ( $\text{ESI}^+$ )  $m/z$   $[\text{M}+\text{H}^+]$  calcd for  $\text{C}_{23}\text{H}_{22}\text{NO}_4$  376.1549, found 376.1552.

### 8-methyl-7-((1-methylpiperidin-4-yl)oxy)-3-phenyl-2H-chromen-2-one (20a)

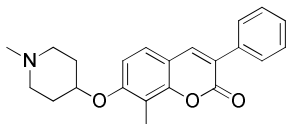

Compound **20a** was obtained as a brown solid ( mg, %).  $^1\text{H}$  NMR (500 MHz, DMSO)  $\delta$  8.21 (s, 1H), 7.71 (d,  $J$  = 8.0 Hz, 2H), 7.62 (d,  $J$  = 8.6 Hz, 1H), 7.46 (d,  $J$  = 8.0 Hz, 2H), 7.17 (d,  $J$  = 8.6, 1H), 4.81 (m, 1H), 3.13~3.01 (m, 4H), 2.69 (s, 3H), 2.28 (s, 3H), 2.19 (m, 2H), 2.00 (m, 2H).  $^{13}\text{C}$  NMR (126 MHz, DMSO)  $\delta$  159.84, 157.28, 152.17, 140.96, 134.78, 128.19, 128.10, 127.27, 126.82, 123.07, 113.36, 113.15, 110.02, 72.62, 50.17, 42.63, 27.92, 8.00. HRMS (ESI<sup>+</sup>)  $m/z$  [M+H<sup>+</sup>] calcd for C<sub>22</sub>H<sub>24</sub>NO<sub>3</sub> 350.1756, found 350.1754.

**3-(4-methoxyphenyl)-8-methyl-7-((1-methylpiperidin-4-yl)oxy)-2H-chromen-2-one**  
(**20b**)

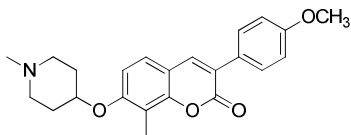

Compound **20b** was obtained as a brown solid (67 mg, 63%).  $^1\text{H}$  NMR (400 MHz, Acetone)  $\delta$  7.98 (s, 1H), 7.73 (d,  $J$  = 8.8 Hz, 2H), 7.52 (d,  $J$  = 8.6 Hz, 1H), 7.07 (d,  $J$  = 8.6 Hz, 1H), 6.99 (d,  $J$  = 8.6, 2H), 4.66 (m, 1H), 2.78 (m, 2H), 2.51 (m, 2H), 2.35 (s, 3H), 2.29 (s, 3H), 2.06 (m, 2H), 1.92 (m, 2H).  $^{13}\text{C}$  NMR (101 MHz, Acetone)  $\delta$  161.05, 160.71, 154.79, 153.62, 147.09, 140.11, 130.56, 128.66, 127.25, 124.42, 114.62, 114.44, 110.64, 73.37, 55.67, 52.64, 45.84, 30.92, 8.49. HRMS (ESI<sup>+</sup>)  $m/z$  [M+H<sup>+</sup>] calcd for C<sub>23</sub>H<sub>26</sub>NO<sub>4</sub> 380.1862, found 380.1861.

**3-(4-chlorophenyl)-8-methyl-7-((1-methylpiperidin-4-yl)oxy)-2H-chromen-2-one**  
(**20c**)

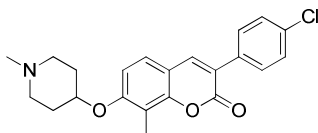

Compound **20c** was obtained as a yellow solid (57 mg, 82%).  $^1\text{H}$  NMR (400 MHz, DMSO)  $\delta$  8.18 (s, 1H), 7.95 (d,  $J$  = 8.8 Hz, 2H), 7.57 (d,  $J$  = 8.6 Hz, 1H), 7.50 (d,  $J$  = 8.6 Hz, 2H), 7.10 (d,  $J$  = 8.6, 1H), 4.63 (m, 1H), 2.72 (m, 2H), 2.49 (m, 2H), 2.34 (s, 3H),

2.22 (s, 3H), 2.01 (m, 2H), 1.81 (m, 2H).  $^{13}\text{C}$  NMR (100 MHz, DMSO)  $\delta$  160.01, 157.58, 156.30, 152.43, 141.53, 133.84, 132.95, 130.18, 128.34, 127.19, 121.83, 113.33, 110.31, 70.18, 50.76, 43.77, 28.56, 8.19. HRMS (ESI+)  $m/z$  [M+H+] calcd for  $\text{C}_{22}\text{H}_{23}\text{ClNO}_3$  384.1366, found 384.1370.

**3-(4-fluorophenyl)-8-methyl-7-((1-methylpiperidin-4-yl)oxy)-2H-chromen-2-one (20d)**

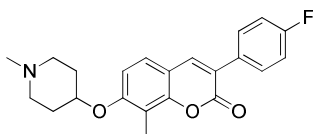

Compound **20d** was obtained as a brown solid (35 mg, 69%).  $^1\text{H}$  NMR (500 MHz, Acetone)  $\delta$  8.04 (s, 1H), 7.80 (d,  $J = 8.9$  Hz, 2H), 7.53 (d,  $J = 8.6$  Hz, 1H), 7.22 (d,  $J = 8.9$  Hz, 2H), 7.08 (d,  $J = 8.6$ , 1H), 4.64 (m, 1H), 2.71 (m, 2H), 2.43 (m, 2H), 2.30 (s, 3H), 2.28 (s, 3H), 2.06 (m, 2H), 1.88 (m, 2H).  $^{13}\text{C}$  NMR (101 MHz, Acetone)  $\delta$  159.99, 158.33, 152.91, 140.50, 130.59, 130.36, 126.61, 122.68, 114.97, 114.75, 113.72, 113.39, 109.84, 72.56, 51.94, 45.24, 30.38, 7.53. HRMS (ESI+)  $m/z$  [M+H+] calcd for  $\text{C}_{22}\text{H}_{23}\text{FNO}_3$  368.1662, found 368.1658.

**8-methyl-7-((1-methylpiperidin-4-yl)oxy)-3-(4-(trifluoromethoxy)phenyl)-2H-chromen-2-one (20e)**

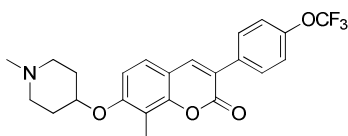

Compound **20e** was obtained as a brown solid (31 mg, 58%).  $^1\text{H}$  NMR (500 MHz, Acetone)  $\delta$  8.16 (s, 1H), 7.92 (d,  $J = 8.8$  Hz, 2H), 7.61 (d,  $J = 8.6$  Hz, 1H), 7.42 (d,  $J = 8.6$  Hz, 2H), 7.18 (d,  $J = 8.6$ , 1H), 4.99 (m, 1H), 2.81 (m, 2H), 2.50 (m, 2H), 2.35 (s, 3H), 2.30 (s, 3H), 2.26 (m, 2H), 2.10 (m, 2H).  $^{13}\text{C}$  NMR (126 MHz, Acetone)  $\delta$  160.69, 158.83, 153.92, 149.65, 142.07, 135.57, 131.18, 127.84, 123.56, 122.41, 121.50, 114.96, 114.59, 110.64, 72.06, 49.83, 43.40, 27.90 8.42. HRMS (ESI+)  $m/z$  [M+H+] calcd for  $\text{C}_{23}\text{H}_{23}\text{F}_3\text{NO}_4$  434.1579, found 434.1581.

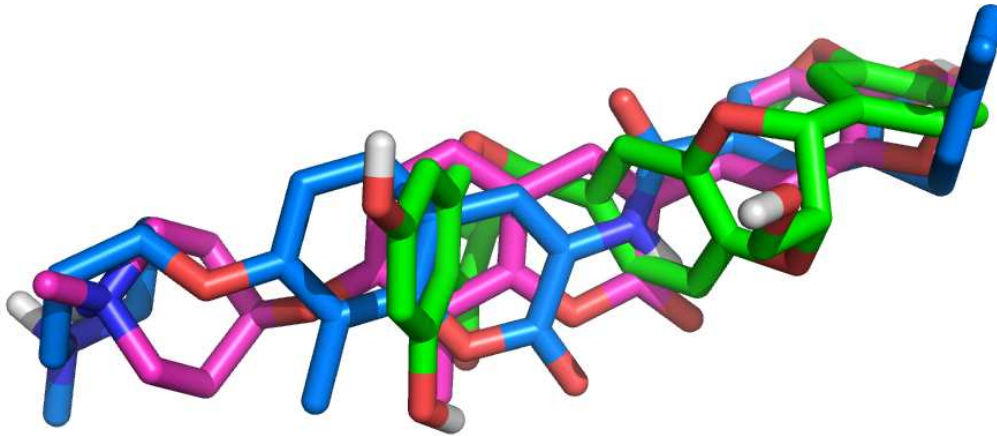

**Figure 1s.** Overlay of KU-398, silybin and arylcoumarin 1
